# Supplementary material
Source: ML conference proceedings conference paper supplement (https://openreview.net/forum?id=bPAIelioYq)

# Four Principles for Physically Interpretable World Models

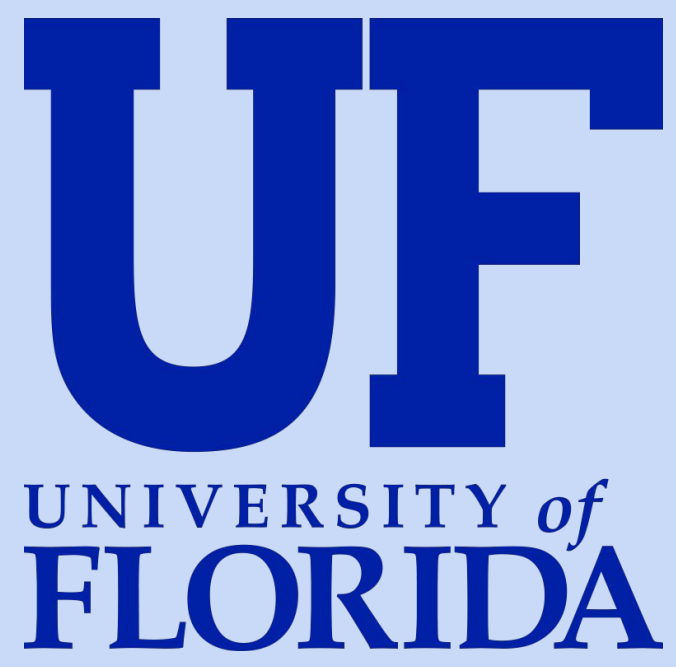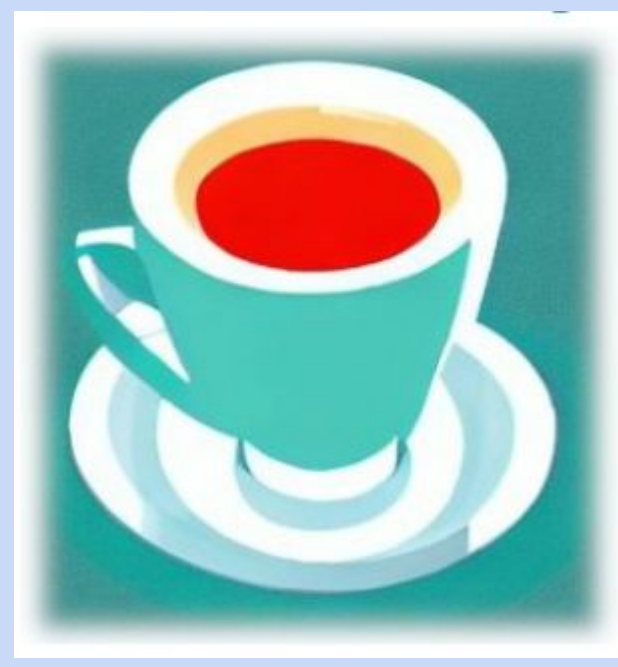

Jordan Peper\*, Zhenjiang Mao\*,  
Yuang Geng, Siyuan Pan, Ivan Ruchkin  
*Trustworthy Engineered Autonomy (TEA) Lab*  
University of Florida

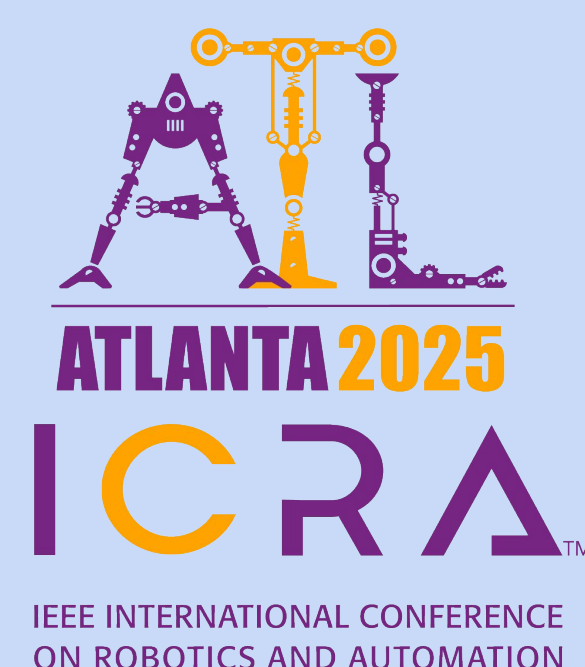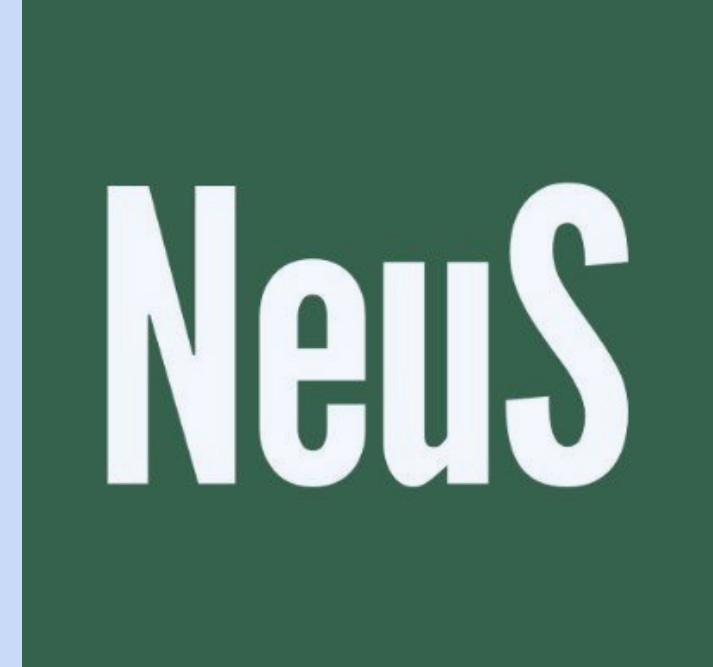

## PROBLEM & CONTRIBUTIONS

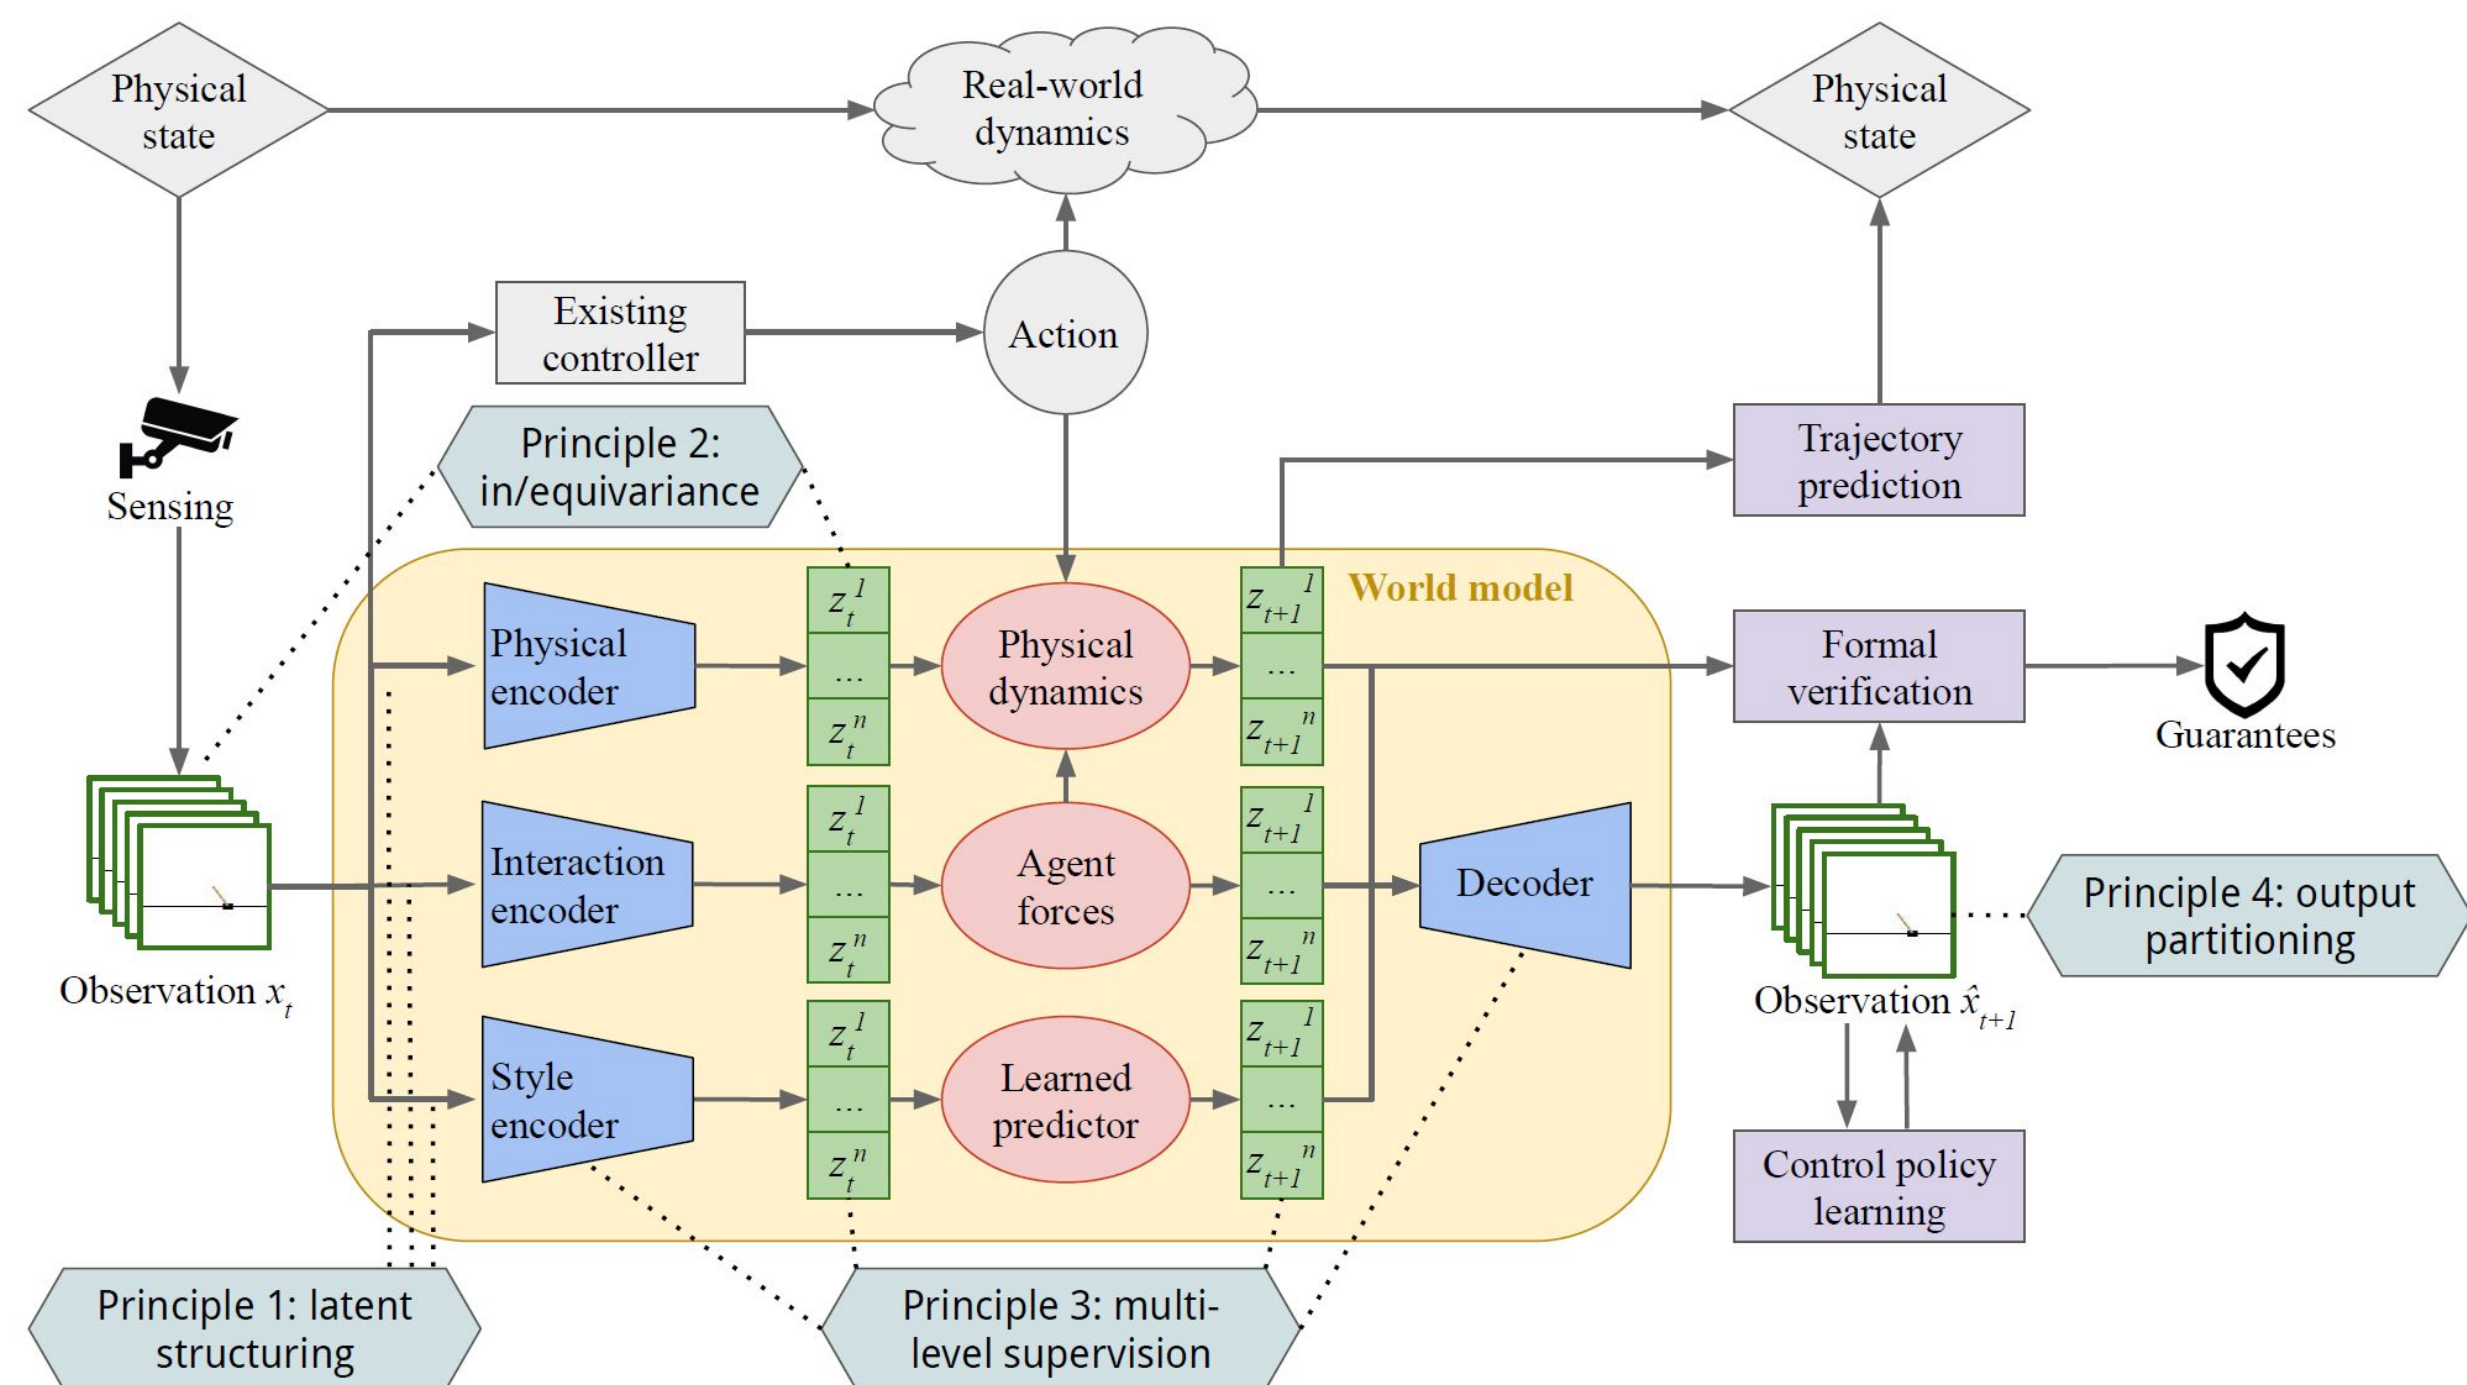

**What is a world model?** Let  $f(x) = (\text{dec} \circ \text{dyn} \circ \text{enc})(x)$  be a *world model*:

- $\text{enc}: X \rightarrow Z$  encodes the observation  $x$  into latent space
- $\text{dyn}: Z \rightarrow Z$  propagates the latent embedding through time
- $\text{dec}: Z \rightarrow X$  decodes the embedding back into the observation space

**Problem:** latent space lacks **physical interpretability**, making it difficult to:

- Understand what the model “knows”
- Integrate classical, state-based controllers or planners
- Provide physically grounded safety guarantees

**Solution:** train world models that are **physically interpretable**

- Latent embeddings  $z$  correspond to physical properties
- Latent dynamics  $\text{dyn}$  emulate physical processes

TEA Lab:

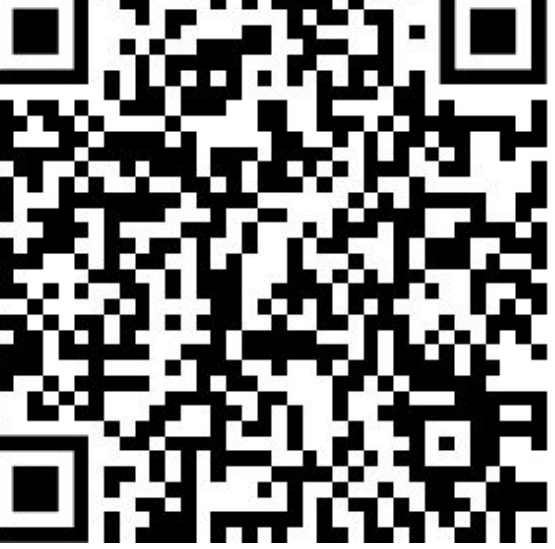

Paper:

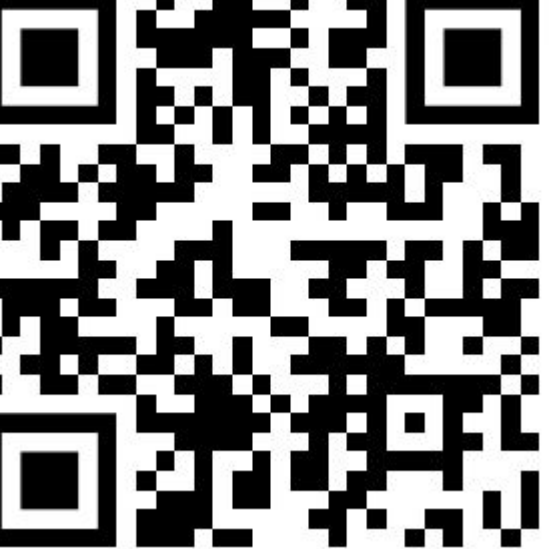

## PRINCIPLE 1

### Functionally organized latent space

- **Principle:** functionally organize the latent space
  - Modular latent embedding and dynamics to encode human conceptual priors (absolute agent dynamics, relative dynamics between other agents, and background features)
- Overall loss is proportional to the losses in each branch:  

$$\mathcal{L} \propto L_1(f_1(\text{enc}_1(x)), x) + L_2(f_2(\text{enc}_2(x)), x) + L_3(f_3(\text{enc}_3(x)), x)$$
- $L$  = loss fn,  $f_i$  = WM branch,  $\text{enc}$  = encoder,  $x$  = input/observation

## PRINCIPLE 3

### Multi-Level and Multi-Strength Supervision

- **Principle:** integrate supervision signals of varied strength from multiple abstraction levels
- **Key Idea:** Physical supervision signals vary in both form (e.g., states, trajectories, constraints) and strength (e.g., exact values, intervals, implicit patterns). Training should adapt accordingly.
- **Why It Matters:** Real-world data often includes a mix of precise labels, coarse annotations, and entirely unlabeled sequences.

## EXPERIMENTAL RESULTS

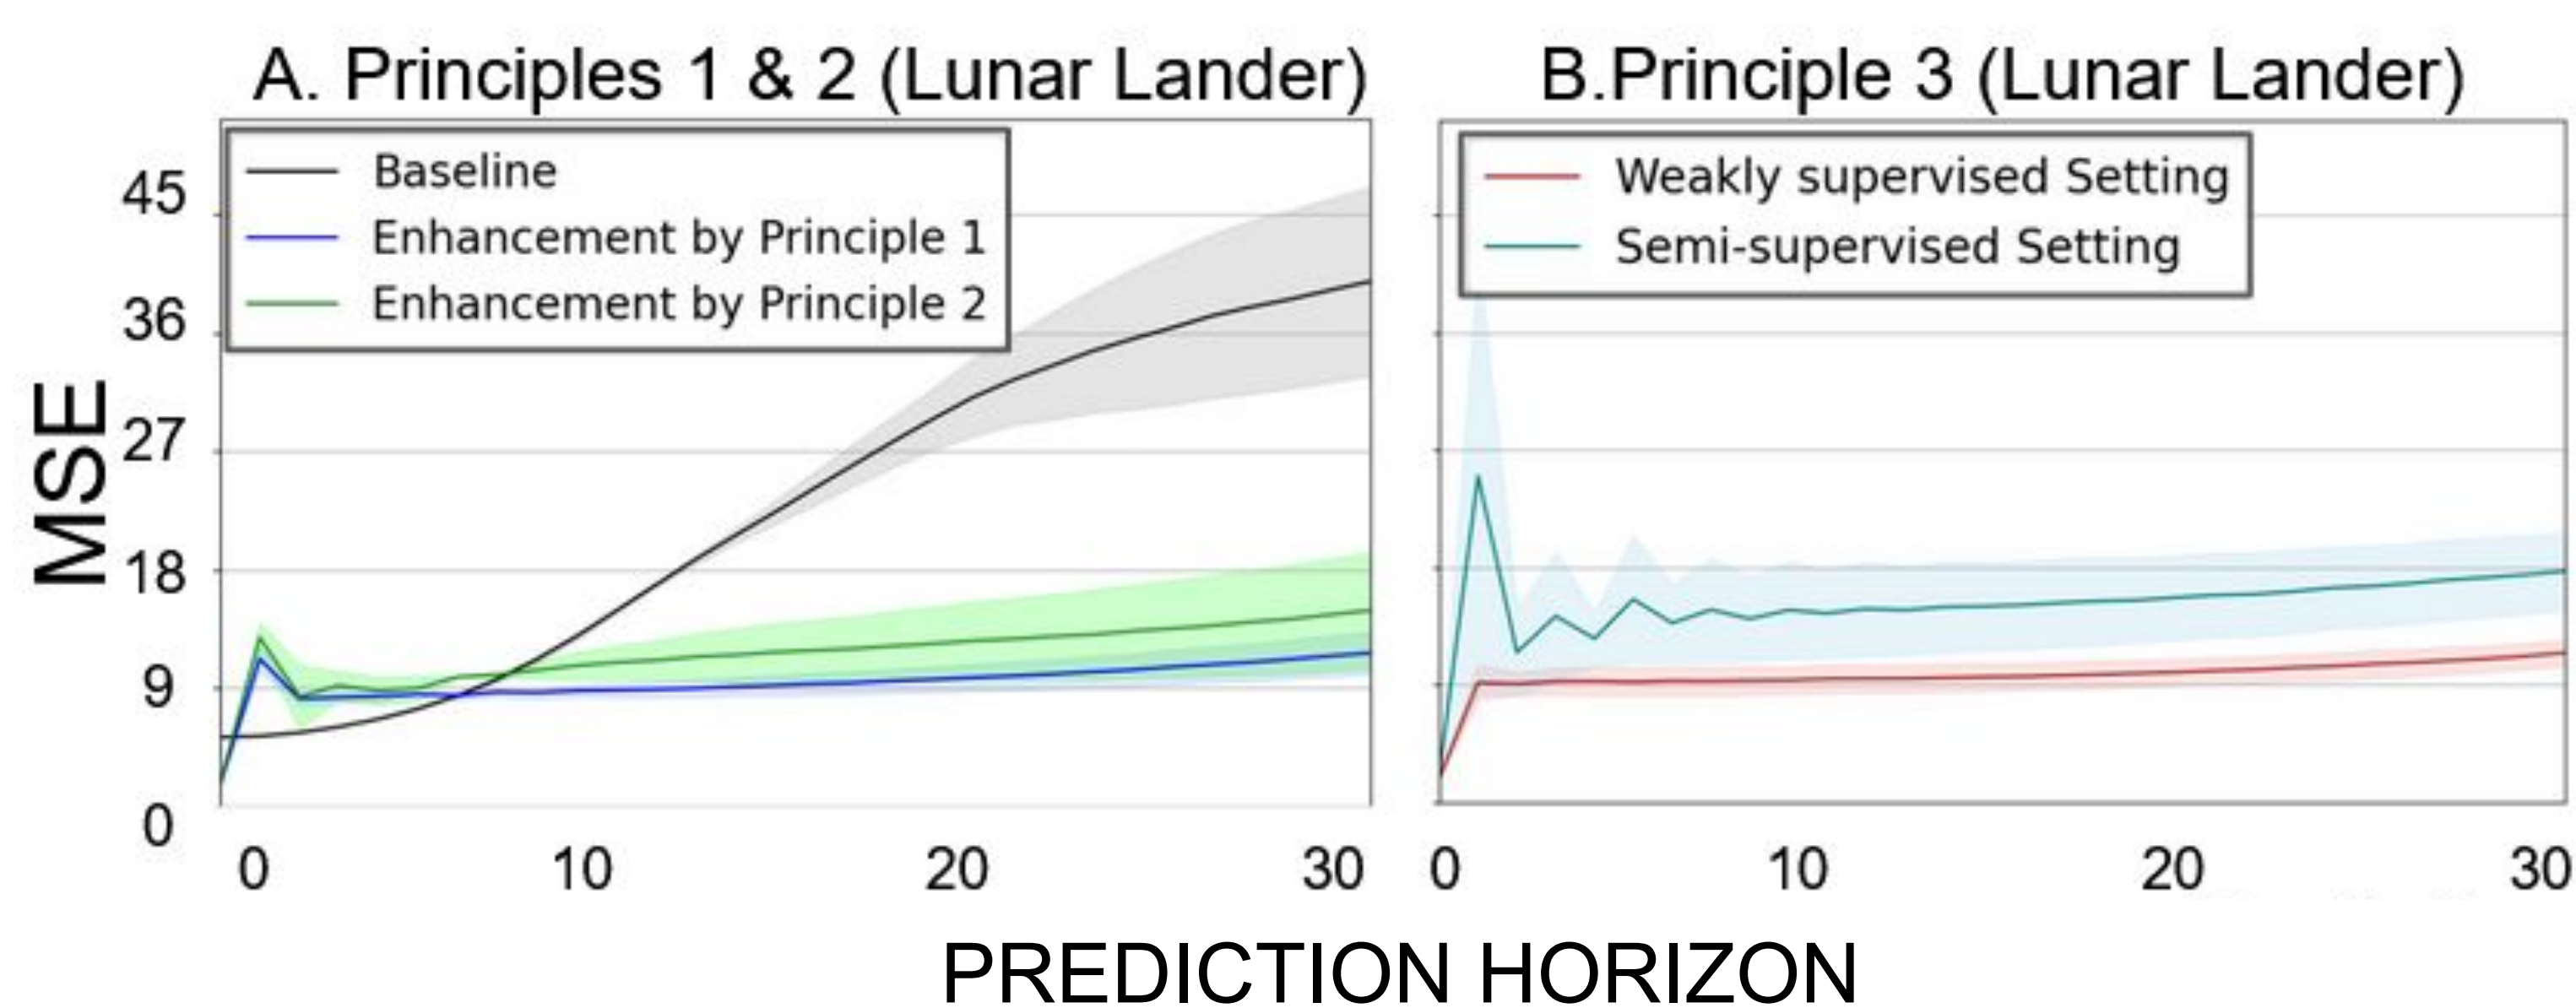

- Functionally organizing the latent space by physical roles (e.g., dynamics, interaction, style) **improves stability** over long horizons
- Encoding physical symmetries into the latent space **enhances generalization** to transformed observations
- Given partially labeled data, adding extra physical signals (e.g., inferred velocity or constraints) significantly **improves learning** and long-term **prediction**

**Reference:** Peper, J. \*, Mao, Z. \*, Geng, Y., Pan, S., & Ruchkin, I. (2025). *Four Principles for Physically Interpretable World Models*. In *Proceedings of the International Conference on Neuro-symbolic Systems (NeuS)*, Philadelphia, PA, 2025. \*Equal contribution

## PRINCIPLE 2

### Invariant/equivariant representations

- **Principle:** learn invariant/equivariant representations of the environment
  - **Invariant:** **do not transform** for transformation  $f$  that does not affect the underlying meaning (noise, image rotation)
  - **Equivariant:** **do transform** for transformation  $f$  that affects the underlying meaning (fog, shape distortion)

$$\mathcal{L}_{wm}(x) \propto \frac{\lambda}{|T|} \sum_{(g,h) \in T} \|\text{enc}(g(x)) - h(\text{enc}(x))\|_2^2$$

- $x$  = input/observation,  $\text{enc}$  = latent encoder,  $g$  = input-space transformation,  $h$  = latent-space transformation
  - To promote invariance:  $h(\text{enc}(x)) = \text{enc}(x)$

## PRINCIPLE 4

### Partitioned World Model Generation

- **Principle:** partition generated observations into segments from multiple simpler generators (enables **scalable verification**)
- Loss function: 
$$\mathcal{L}_{gen} = \|x - \hat{x}\|^2 + \lambda \sum_{i=1}^N \|x_i - \hat{x}_i\|^2$$

- **Segment-wise reconstruction loss:** Enforces each decoder to accurately model its part of the input
- **Combined reconstruction loss:** Encourages the model to reproduce the full observation when segments are combined

| World model           | Environment  | Average MSE | Average SSIM | Model Size |
|-----------------------|--------------|-------------|--------------|------------|
| Baseline (monolithic) | Cart Pole    | 0.02856     | 0.997122     | 200,259    |
| Partitioned 3-way     | Cart Pole    | 0.05176     | 0.995614     | 144,665    |
| Baseline (monolithic) | Lunar Lander | 0.18801     | 0.8686       | 360,773    |
| Partitioned 3-way     | Lunar Lander | 0.306       | 0.6289       | 78,101     |

## GAP IN EXISTING WORK

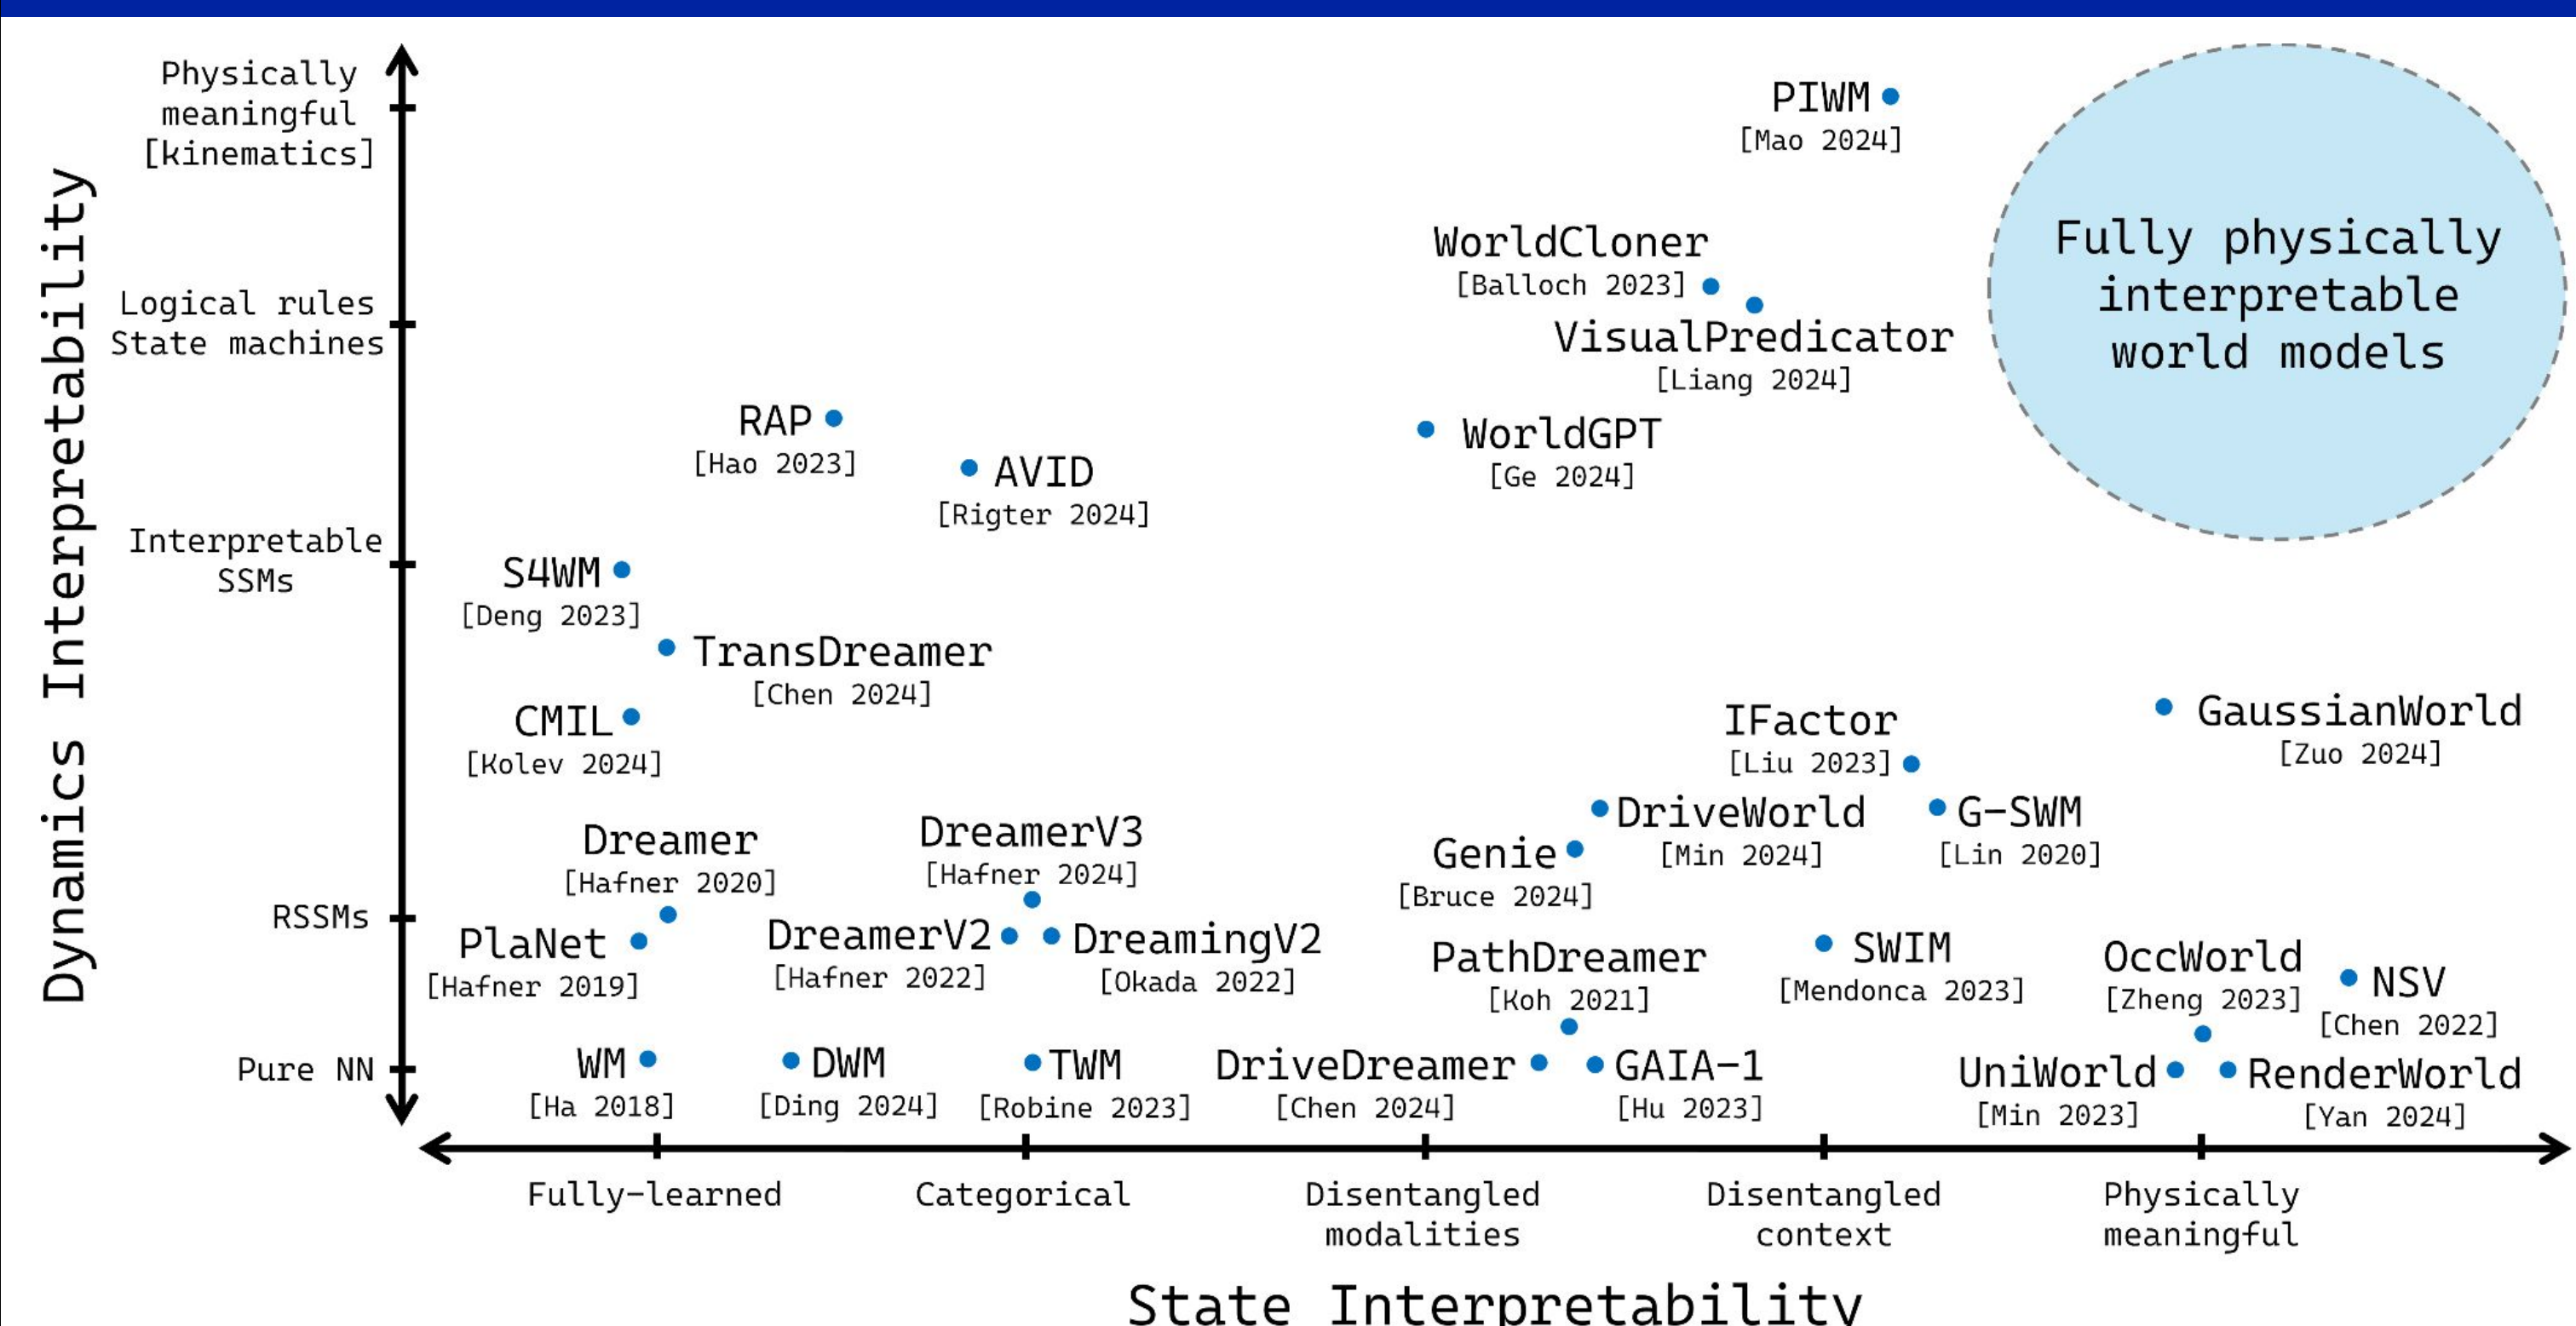

Supplement: supplementary_material [file attachment]
